# Supplementary material for: From anti-solvent synthesis to polaron-driven transport: exploring the promise of lead-free Rb2SnCl6 nanocrystals
Source: Royal Society of Chemistry journal article supplement (doi:10.1039/d6ra01082b), 2026-05-12
Supplement: d6ra01082b1.pdf [file d6ra01082b1.pdf]

**Table S1:** Crystallographic data for Rb<sub>2</sub>SnCl<sub>6</sub> halide double perovskite nanocrystals.

| <b>Phase</b>               | <b>Rb<sub>2</sub>SnCl<sub>6</sub></b> |
|----------------------------|---------------------------------------|
| <b>CSD- Number</b>         | 2381630                               |
| <b>Space Group</b>         | Fm-3m                                 |
| <b>λ (Å)</b>               | Cu-Kα: 1.544390                       |
| <b>T (°K)</b>              | 303                                   |
| <b>a (Å)</b>               | 10.122                                |
| <b>b (Å)</b>               | 10.122                                |
| <b>c (Å)</b>               | 10.122                                |
| <b>α (°)</b>               | 90                                    |
| <b>β (°)</b>               | 90                                    |
| <b>γ (°)</b>               | 90                                    |
| <b>V (Å<sup>3</sup>)</b>   | 1037.1267                             |
| <b>Z</b>                   | 4                                     |
| <b>DWF (Å<sup>2</sup>)</b> | 3.28508                               |
| <b>R<sub>p</sub></b>       | 3.95                                  |
| <b>R<sub>wp</sub></b>      | 4.84                                  |
| <b>R<sub>exp</sub></b>     | 2.68                                  |
| <b>χ<sup>2</sup></b>       | 3.2686                                |
